# Supplementary material
Source: publisher figshare collection journal article supplement (https://karger.figshare.com/articles/dataset/_/26037244)
Supplement: Supplementary file 1 [file 1]

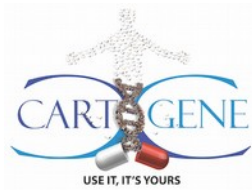

## **Additional information about the CARTaGENE genetic data**

### **Table of contents**

|                                                                                |           |
|--------------------------------------------------------------------------------|-----------|
| <b>1. GENOTYPING DATA (n=29 337, GSA data only ).....</b>                      | <b>2</b>  |
| 1.1 Genotyping data summary.....                                               | 2         |
| 1.2 Creating the merged dataset (gsa_merged_hg38_20211220) for imputation..... | 4         |
| 1.3 Creating the imputed dataset (imputation_gsa_merged_20220429).....         | 7         |
| <b>2. EXOME SEQUENCING DATA (n=198).....</b>                                   | <b>16</b> |
| 2.1 Exome data summary.....                                                    | 16        |
| 2.2 Creating the VCF files.....                                                | 16        |
| <b>3. RNA-SEQ DATA (n=911).....</b>                                            | <b>17</b> |

## 1. GENOTYPING DATA (n=29 337, GSA data only )

### 1.1 Genotyping data summary

Timeline of genotyping projects at CARTaGENE.

| Year | Array Type                                                    | Nb*  | Array analysis software and details                                                                                                                                                               | Comments                                                                                                                                                                                                                                                                                                                                                                                                                                                                                                                                                                  |
|------|---------------------------------------------------------------|------|---------------------------------------------------------------------------------------------------------------------------------------------------------------------------------------------------|---------------------------------------------------------------------------------------------------------------------------------------------------------------------------------------------------------------------------------------------------------------------------------------------------------------------------------------------------------------------------------------------------------------------------------------------------------------------------------------------------------------------------------------------------------------------------|
| 2012 | Omni 2.5<br>(HumanOmni2.5-8v1-Multi_A)                        | 937  | Genome Studio: 2.0.4<br>Genome Studio project thresholds (recommended by Illumina):<br>No-call Threshold: 0.15<br>Clustering Intensity Threshold: 0.20                                            | Returned data generated by Dr P.Awadalla.<br>The following papers should be consulted for details on sample selection:<br>Hodgkinson et al. High-Resolution Genomic Analysis of Human Mitochondrial RNA Sequence Variation. Science. 2014; 344: 413-415.<br>Hussin et al. Recombination affects accumulation of damaging and disease-associated mutations in human populations. Nature Genetics. 2015; 47; 47 (4): 400-404.                                                                                                                                               |
| 2017 | Affymetrix Axiom 2.0 UK Biobank gene chip (Axiom_UKB_WCSG-96) | 990  | Axiom Analysis Suite: 4.0.3.3<br>Workflow and annotation version: r5                                                                                                                              | Data generated through a CPTP pilot genotyping project.<br>Caucasians, participants selected according to quantity of health data available                                                                                                                                                                                                                                                                                                                                                                                                                               |
| 2017 | GSAv1 + Multi disease panel<br>(GSAMD-24v1-0_20011747_A1)     | 5237 | Genome Studio: 2.0.4<br>Genome Studio project thresholds (recommended by Genome Center – Erasmus Medical Center, Netherlands):<br>No-call Threshold: 0.27<br>Clustering Intensity Threshold: 0.20 | This project is an internal genotyping project led by CARTaGENE. Most of the DNA samples came from participants selected according to quantity of health data available; however 2800 participants were selected as part of a research project on restless leg syndrome. Selection criteria for the 1400 cases in this subset were: answered yes to the questions “do you have restless leg syndrome?” or “Have you been diagnosed with restless leg syndrome?”. The 1400 remaining samples from this subset were age/sex-matched controls free of neurological diseases. |
| 2018 | GSAv1 (GSA-24v1-0_A1)                                         | 726  | Genome Studio: 2.0.4<br>Genome Studio project thresholds (recommended by Illumina):<br>No-call Threshold: 0.15<br>Clustering Intensity Threshold: 0.20                                            | This project is an internal genotyping project led by CARTaGENE. The DNA samples came from participants selected according to quantity of health data available.                                                                                                                                                                                                                                                                                                                                                                                                          |
| 2018 | GSAv2 + Multi disease panel<br>(GSAMD-24v2-0_20024620_A)      | 4179 | Genome Studio: 2.0.4<br>Genome Studio project thresholds (recommended by Illumina):<br>No-call Threshold: 0.15<br>Clustering Intensity Threshold: 0.20                                            | This project is an internal genotyping project led by CARTaGENE. The DNA samples came from participants selected according to quantity of health data available.                                                                                                                                                                                                                                                                                                                                                                                                          |

|      |                                                                      |       |                                                                                        |                                                                                                                                                                                                                                          |
|------|----------------------------------------------------------------------|-------|----------------------------------------------------------------------------------------|------------------------------------------------------------------------------------------------------------------------------------------------------------------------------------------------------------------------------------------|
| 2020 | GSAv3 + Multi disease panel<br>(MHI_GSAMD-24v3-0-<br>EA_20034606_C1) | 1909  | Genome Studio: 2.0.5<br>Genome Studio project thresholds (recommended by<br>Illumina): | This genotyping project was led by Dr M-P Dubé at the<br>Montreal Heart Institute. Samples previously genotyped<br>using Omni and Axiom where re-genotyped using GSA.<br>This data was QC'ed at CARTaGENE using our regular<br>pipeline. |
| 2021 | GSAv2 + Multi disease panel +<br>addon<br>(CaG_addon_v1_20037253_A2) | 17286 | Genome Studio: 2.0.5<br>Genome Studio project thresholds (recommended by<br>Illumina): | All remaining samples were selected for this project.<br>The goal was to have genotyping data on all CARTaGENE<br>participants with available blood samples.                                                                             |

\*The number of genotypes in the shared data files might be slightly different due to withdrawals from the CARTaGENE study.

**Although all genotyping datasets are available, CARTaGENE recommends using the individual GSA datasets (5 datasets) and/or the imputed dataset depending on your research needs.**

## 1.2 Creating the merged dataset (gsa\_merged\_hg38\_20211220) for imputation.

**Important note:** Variants not present on all GSA array versions have not been removed from the merged dataset. The merged dataset is not suitable for association studies.

The next section details the pipeline used for the quality control of CARTaGENE's genotyping data. The commands, threshold and configurations used are referenced.

### Raw data QC

#### **Illumina/Genome Studio genotyping**

Missing genders were imported for adequate clustering of SNPs on heterochromosomes. When the genome center that generated the data did not recommend or justify any parameters for the clustering, Illumina recommended parameters were used:

- No-call Threshold = 0.15
- Clustering Intensity Threshold = 0.20

Data was exported in plink format.

#### **Axiom**

Axiom Analysis suite configuration:

- Software up to date with latest Axiom UK biobank array annotations
- Best Practice Workflow was used
- Gender File was provided for accurate heterochromosome calls
- Threshold settings: Load settings for Human, then modify:
- Sample QC: all values to 0 (QC will be done with plink)
- SNP QC: cr-cutoff = 0 (QC will be done with plink)

Data was exported in plink format.

**Note:** Next steps of quality control were performed using Plink v1.90b 6.2 64-bit.

### Preliminary QC steps

Remove the control SNPs (chromosome 0) and control samples (used as QC by genomic centers).

```
plink --bfile <INPUT> --not-chr 0 --remove <ARRAY CONTROLS> --make-bed --out <OUTPUT>
```

Rename and set correct gender to samples rescued from identified plate issues (cf. Post QC paragraph).

This is the initial set.

## **Sample QC**

### **1. Find discordant gender**

Compare the sample known gender and the genetic gender imputed with plink:

```
plink --bfile <INPUT> --check-sex --maf 0.02 --make-bed --out <OUTPUT>
```

Samples with discordant genders are removed at the end of the sample quality control.

### **2. Remove replicates**

If some samples were deliberately replicated, the samples with the lower call rates are removed from the set at this step. The call rates are computed with plink:

```
plink --bfile <INPUT> --missing --out <OUTPUT>
```

### **3. Filter bad quality samples**

The SNPs removed during the sample QC are restored at the end of the sample QC to filter them properly without bad quality samples.

- Remove SNPs with a call rate < 95%

```
plink --bfile <INPUT> --geno 0.05 --make-bed --out <OUTPUT>
```

- Remove SNPs failing Hardy-Weinberg test with  $10^{-6}$  threshold

```
plink --bfile <INPUT> --hwe 0.000001 --make-bed --out <OUTPUT>
```

- List samples with a call rate < 95%

plink --bfile <INPUT> --mind 0.05 --make-bed --out <OUTPUT>

These samples are removed at the end of the sample QC.

- Remove contaminated and duplicated samples

#### 4. SNP pruning

SNPs that are in linkage equilibrium are pruned to reduce the complexity of the pairwise IBD analysis.

The IBD analysis excludes uninformative SNPs.

plink --bfile <INPUT> --indep-pairwise 50 5 0.5 --out <LD file>

#### 5. Pairwise IBD analysis, filter PI\_HAT > 0.2

The pairs of samples with a PI\_HAT > 0.2 are kept in a list.

plink --bfile <INPUT> --exclude <LD FILE>.out --genome --min 0.2 --make-bed --out <OUTPUT>

#### 6. Remove samples similar to at least 50% of the samples

From the IBD 0.2 pair list, samples similar to at least 50% of the samples of the whole set are removed.

These samples are considered contaminated.

They are removed before the next step IBD 0.85.

#### 7. Pairwise IBD analysis, filter PI\_HAT > 0.85

Pairs of samples with a PI\_HAT > 0.85 are considered duplicates. If the correct sample cannot be identified with absolute certainty, both samples of the pair are eliminated.

plink --bfile <INPUT> --exclude <LD FILE>.out --genome --min 0.85 --make-bed --out <OUTPUT>

Samples flagged as duplicates and contaminated are listed and removed from the initial set.

## **SNP QC**

### **1. Remove samples failing the sample QC**

The samples removed for the following step are removed from the initial set:

- Discordant gender
- Sample call rate < 95%
- Contaminants (IBD 0.2, samples paired with 50% of samples)
- Duplicates (IBD 0.85)

This ensures that the SNPs removed later are not influenced by bad quality samples.

### **2. Remove SNPs with a call rate < 95%**

```
plink --bfile <INPUT> --geno 0.05 --make-bed --out <OUTPUT>
```

### **3. Remove SNPs failing Hardy-Weinberg test with $10^{-6}$ threshold**

```
plink --bfile <INPUT> --hwe 0.000001 --make-bed --out <OUTPUT>
```

## **Post QC**

The samples that failed the QC are mapped on the plates used for the array analysis. If a pattern is identified, appropriate actions are taken. These actions could be:

- Remove the plate line, column, region or the total plate
- Shift samples: rescue these samples (rename and set correct gender) and redo the QC starting at PRELIMINARY QC STEPS.

### **1.3 Creating the imputed dataset (imputation\_gsa\_merged\_20220429)**

This section details the pipeline used for the creation of CARTaGENE's imputation data. The commands, threshold and configurations used are described in the "Details of commands used".

The quality control and Imputation on TOPMed was performed by Ken Sin Lo from the team of Dr Guillaume Lettre.

### **Data source**

The imputation data was prepared from the 5 GSA datasets available as of 2022-04-01 (refer to section 1.1 and 1.2 of this document for QC):

- **GSA\_760**: 726 individuals, 626,378 variants
- **GSA\_4224**: 4180 individuals, 728,920 variants
- **GSA\_5300**: 5239 individuals, 658,297 variants
- **GSA\_archi**: 1909 individuals, 688,796 variants
- **GSA\_17k**: 17,286 individuals, 645,076 variants

### **Softwares used**

- plink2: plink/2.00-10252019-avx2
- plink: plink/1.9b\_6.21-x86\_64
- bgzip: tabix/0.2.6
- bcftools: bcftools/1.11
- [vcf2gprobs.jar](#) and [gprobsmetrics.jar](#)  
([https://faculty.washington.edu/browning/beagle\\_utilities/utilities.html](https://faculty.washington.edu/browning/beagle_utilities/utilities.html))
- R version 4.1.2 (2021-11-01)
- Ruby scripts: align\_table.rb, fix\_bim.rb, merge\_frq.rb, compute\_Rsq.rb, filter\_mono.rb

### **Reference population**

The reference population used for the imputation is the TOPMed Imputation Reference panel, a diverse reference panel including information from 97,256 deeply sequenced human genomes (<https://imputation.biodatacatalyst.nhlbi.nih.gov/#!/pages/about>).

### **Data preparation**

1. Identify individuals who were genotyped in more than one dataset



There are 3 individuals who are duplicated. Remove all 3 in GSA\_760 because there are fewer variants in that dataset.

2. Quality control each of the 5 datasets separately
  - a) Run Will Rayner script (<https://www.well.ox.ac.uk/~wrayner/strand>) to put all alleles on the positive strand.
  - b) Remove variant duplicates. Keep the ones with the lowest missingness.
  - c) For multi-allelic variants, keep only the one allele with the highest MAF.
  - d) Filter for Hardy-Weinberg equilibrium and variant missingness (--hwe 0.000001 midp --geno 0.05).
3. Merge the 5 datasets.
4. Remove these variants from the merged dataset:
  - Monomorphic variants
  - INDELs: variants with D and I as alleles
  - Variants on chr24
  - Variants with a distance greater than 0.075 from the diagonal on the plots comparing allele frequencies between each pair of the 5 datasets
5. Convert the PLINK files to VCF files.
  - a) Split the VCF by chromosome for imputation.
  - b) Split in 2 batches of ~15,000 individuals selected randomly (because of the limit of 25,000 individuals maximum on the TOPMed server).
6. Imputation on the TOPMed server: <https://imputation.biodatacatalyst.nhlbi.nih.gov>
7. Merge the 2 batches back together.
  - 7.a. Compute allele frequencies.
  - 7.b. Remove monomorphic variants.
  - 7.c. Compute a merged Rsq (imputation quality score) for the remaining variants.
  - 7.d. Remove obsolete information from VCFs.

### **Details of commands used for imputation**

1. Identify individuals who were genotyped in more than one dataset.

```
tail -n +2 gsa.4224.final.psam | awk '{ print "4224\t" $0 }' > all_samples.txt
```

```
tail -n +2 gsa.5300.final.psam | awk '{ print "5300\t" $0 }' >> all_samples.txt
tail -n +2 gsa.760.final.psam | awk '{ print "760\t" $0 }' >> all_samples.txt
tail -n +2 gsa.archi.final.psam | awk '{ print "1909\t" $0 }' >> all_samples.txt
tail -n +2 gsa.17k.final.hg19.psam | awk '{ print "17286\t" $0 }' >>
all_samples.txt
cut -f 2-4 all_samples.txt | sort | uniq -c -d
```

## 2. Quality control of each of the 5 datasets separately.

Convert PFILE to BFILE (because of Error: Unrecognized flag ('--update-chr') in PLINK2). The flag '--update-chr' is needed in the next step.

```
plink2 --pfile gsa.4224.final --make-bed --out gsa.4224.final
plink2 --pfile gsa.5300.final --make-bed --out gsa.5300.final
plink2 --pfile gsa.760.final --make-bed --out gsa.760.final
plink2 --pfile gsa.archi.final --make-bed --out gsa.archi.final
plink2 --pfile gsa.17k.final.hg19 --make-bed --out gsa.17k.final
```

2.a. Run Will Rayner script (<https://www.well.ox.ac.uk/~wrayner/strand/>) to put all alleles on the positive strand.

```
wget https://www.well.ox.ac.uk/~wrayner/strand/update_build.sh
wget https://www.well.ox.ac.uk/~wrayner/strand/GSAMD-24v1-0_20011747_A1-b38-
strand.zip
wget https://www.well.ox.ac.uk/~wrayner/strand/GSA-24v1-0_A1-b38-strand.zip
wget https://www.well.ox.ac.uk/~wrayner/strand/GSAMD-24v2-0_20024620_A1-b38-
strand.zip
wget https://www.well.ox.ac.uk/~wrayner/strand/GSAMD-24v2-0_20024620_B1-b38-
strand.zip

sh strand_Will_Rayner/update_build.sh gsa.4224.final strand_Will_Rayner/GSAMD-24v2-
0_20024620_A1-b38.strand gsa.4224.final.WR_hg38

sh strand_Will_Rayner/update_build.sh gsa.5300.final strand_Will_Rayner/GSAMD-24v1-
0_20011747_A1-b38.strand gsa.5300.final.WR_hg38

sh strand_Will_Rayner/update_build.sh gsa.760.final strand_Will_Rayner/GSA-24v1-
0_A1-b38.strand gsa.760.final.WR_hg38

sh strand_Will_Rayner/update_build.sh gsa.archi.final strand_Will_Rayner/GSAMD-
24v2-0_20024620_B1-b38.strand gsa.archi.final.WR_hg38

sh strand_Will_Rayner/update_build.sh gsa.17k.final strand_Will_Rayner/GSAMD-24v2-
0_20024620_B1-b38.strand gsa.17k.final.WR_hg38
```

2.b. Remove variant duplicates. Keep the ones with the lowest missingness.

```
cut -f 1,4,5,6 gsa.4224.final.WR_hg38.bim | sort -k1,1V -k2,2n -k3,3V -k4,4V | uniq
-d -c | sed 's/\s\s*/\t/g' > gsa.4224.final.WR_hg38.bim.dup

ruby align_table.rb -a gsa.4224.final.WR_hg38.bim -d 1,4,5,6 -A
gsa.4224.final.WR_hg38.bim.dup -D 3,4,5,6 --intersection -o tmp1

ruby align_table.rb -a tmp1 -d 2 -A gsa.4224.final.WR_hg38.lmiss -B 1 -C ' ' -D 2
--intersection -o tmp2
```

Sort tmp2 in Excel to put duplicates with lowest missingness first.

```
ruby align_table.rb -a tmp2 -d 1,4,5,6 -A tmp2 -D 1,4,5,6 --intersection2 -o tmp3
uniq tmp3.table2 > tmp4

ruby align_table.rb -a tmp2 -d 2 -A tmp4 -D 2 --difference -o tmp5

cut -f 2 tmp5.table1_diff > gsa.4224.final.WR_hg38.bim.dup_toremove

plink -bfile gsa.4224.final.WR_hg38 --exclude
gsa.4224.final.WR_hg38.bim.dup_toremove --make-bed --out
gsa.4224.final.WR_hg38.wodup
```

Repeat for the other datasets. For GSA\_760, also remove the 3 duplicated individuals:

```
plink -bfile gsa.760.final.WR_hg38 --remove overlap_individuals_toremove --exclude
gsa.760.final.WR_hg38.bim.dup_toremove --make-bed --out gsa.760.final.WR_hg38.wodup
```

2.c. For multi-allelic variants, keep only the one allele with the highest MAF.

Compute minor allele frequencies.

```
plink -bfile gsa.4224.final.WR_hg38.wodup --freq --out gsa.4224.final.WR_hg38.wodup
plink -bfile gsa.5300.final.WR_hg38.wodup --freq --out gsa.5300.final.WR_hg38.wodup
plink -bfile gsa.760.final.WR_hg38.wodup --freq --out gsa.760.final.WR_hg38.wodup
plink -bfile gsa.archi.final.WR_hg38.wodup --freq --out
gsa.archi.final.WR_hg38.wodup

plink -bfile gsa.17k.final.WR_hg38.wodup --freq --out gsa.17k.final.WR_hg38.wodup

paste gsa.4224.final.WR_hg38.wodup.bim <(tail -n +2
gsa.4224.final.WR_hg38.wodup.frq | sed 's/\s\s*/\t/g') > tmp.info.4224

paste gsa.5300.final.WR_hg38.wodup.bim <(tail -n +2
gsa.5300.final.WR_hg38.wodup.frq | sed 's/\s\s*/\t/g') > tmp.info.5300

paste gsa.760.final.WR_hg38.wodup.bim <(tail -n +2 gsa.760.final.WR_hg38.wodup.frq
| sed 's/\s\s*/\t/g') > tmp.info.760

paste gsa.archi.final.WR_hg38.wodup.bim <(tail -n +2
gsa.archi.final.WR_hg38.wodup.frq | sed 's/\s\s*/\t/g') > tmp.info.archi

paste gsa.17k.final.WR_hg38.wodup.bim <(tail -n +2 gsa.17k.final.WR_hg38.wodup.frq
| sed 's/\s\s*/\t/g') > tmp.info.17k
```

Create lists of multi-allelic variants to be excluded in the next step.

```
ruby fix_bim.rb
```

```
cp gsa.4224.final.WR_hg38.wodup.bim_FIX gsa.4224.final.WR_hg38.wodup.bim
cp gsa.5300.final.WR_hg38.wodup.bim_FIX gsa.5300.final.WR_hg38.wodup.bim
cp gsa.760.final.WR_hg38.wodup.bim_FIX gsa.760.final.WR_hg38.wodup.bim
cp gsa.archi.final.WR_hg38.wodup.bim_FIX gsa.archi.final.WR_hg38.wodup.bim
cp gsa.17k.final.WR_hg38.wodup.bim_FIX gsa.17k.final.WR_hg38.wodup.bim
```

2.d. Filter for Hardy-Weinberg equilibrium and variant missingness (--hwe 0.000001 midp --geno 0.05).

```
plink -bfile gsa.4224.final.WR_hg38.wodup --hwe 0.000001 midp --geno 0.05 --exclude
gsa.4224.final.WR_hg38.wodup.varToRemove --make-bed --out
gsa.4224.final.WR_hg38.wodup.QC

plink -bfile gsa.5300.final.WR_hg38.wodup --hwe 0.000001 midp --geno 0.05 --exclude
gsa.5300.final.WR_hg38.wodup.varToRemove --make-bed --out
gsa.5300.final.WR_hg38.wodup.QC

plink -bfile gsa.760.final.WR_hg38.wodup --hwe 0.000001 midp --geno 0.05 --exclude
gsa.760.final.WR_hg38.wodup.varToRemove --make-bed --out
gsa.760.final.WR_hg38.wodup.QC

plink -bfile gsa.archi.final.WR_hg38.wodup --hwe 0.000001 midp --geno 0.05
--exclude gsa.archi.final.WR_hg38.wodup.varToRemove --make-bed --out
gsa.archi.final.WR_hg38.wodup.QC

plink -bfile gsa.17k.final.WR_hg38.wodup --hwe 0.000001 midp --geno 0.05 --exclude
gsa.17k.final.WR_hg38.wodup.varToRemove --make-bed --out
gsa.17k.final.WR_hg38.wodup.QC
```

3. Merge the 5 datasets.

```
plink --merge-list datasets_to_merge.txt --make-bed --out gsa_merged_hg38
```

4. Remove these variants from the merged dataset:

- Monomorphic variants
- INDELs: variants with D and I as alleles
- Variants on chr24
- Variants with a distance greater than 0.075 from the diagonal on the plots comparing allele frequencies between each pair of the 5 datasets

Compute allele counts.

```
plink -bfile gsa.4224.final.WR_hg38.wodup.QC --freq counts --out
gsa.4224.final.WR_hg38.wodup.QC.frq

plink -bfile gsa.5300.final.WR_hg38.wodup.QC --freq counts --out
gsa.5300.final.WR_hg38.wodup.QC.frq
```

```

plink -bfile gsa.760.final.WR_hg38.wodup.QC --freq counts --out
gsa.760.final.WR_hg38.wodup.QC.frq

plink -bfile gsa.archi.final.WR_hg38.wodup.QC --freq counts --out
gsa.archi.final.WR_hg38.wodup.QC.frq

plink -bfile gsa.17k.final.WR_hg38.wodup.QC --freq counts --out
gsa.17k.final.WR_hg38.wodup.QC.frq

```

Create one list of all the variants and their frequency counts.

```

ruby merge_frq.rb

head -n 1 table_frqcount.txt > table_frqcount_clean.txt

tail -n +2 table_frqcount.txt | awk '$1 !~ /^24/ && $3 != "D" && $3 != "I"' >>
table_frqcount_clean.txt

```

Compute distances in R to define the outliers.

```

frqcount <- read.table("table_frqcount_clean.txt", sep="\t", header=T)

frqcount$af_17k <- frqcount$gsa_17k_count1 / (frqcount$gsa_17k_count1 +
frqcount$gsa_17k_count2)

frqcount$af_760 <- frqcount$gsa_760_count1 / (frqcount$gsa_760_count1 +
frqcount$gsa_760_count2)

frqcount$af_4224 <- frqcount$gsa_4224_count1 / (frqcount$gsa_4224_count1 +
frqcount$gsa_4224_count2)

frqcount$af_5300 <- frqcount$gsa_5300_count1 / (frqcount$gsa_5300_count1 +
frqcount$gsa_5300_count2)

frqcount$af_archi <- frqcount$gsa_archi_count1 / (frqcount$gsa_archi_count1 +
frqcount$gsa_archi_count2)

frqcount$d_17k_760 <- abs(frqcount$af_17k - frqcount$af_760) / sqrt(2)
frqcount$d_17k_4224 <- abs(frqcount$af_17k - frqcount$af_4224) / sqrt(2)
frqcount$d_17k_5300 <- abs(frqcount$af_17k - frqcount$af_5300) / sqrt(2)
frqcount$d_17k_archi <- abs(frqcount$af_17k - frqcount$af_archi) / sqrt(2)
frqcount$d_5300_760 <- abs(frqcount$af_5300 - frqcount$af_760) / sqrt(2)
frqcount$d_5300_4224 <- abs(frqcount$af_5300 - frqcount$af_4224) / sqrt(2)
frqcount$d_5300_archi <- abs(frqcount$af_5300 - frqcount$af_archi) / sqrt(2)
frqcount$d_4224_760 <- abs(frqcount$af_4224 - frqcount$af_760) / sqrt(2)
frqcount$d_4224_archi <- abs(frqcount$af_4224 - frqcount$af_archi) / sqrt(2)
frqcount$d_archi_760 <- abs(frqcount$af_archi - frqcount$af_760) / sqrt(2)

```

Identify obvious outliers using the distance from the diagonal.

```

outl_17k_760 <- subset(frqcount, frqcount$d_17k_760 > 0.075)
outl_17k_4224 <- subset(frqcount, frqcount$d_17k_4224 > 0.075)
outl_17k_5300 <- subset(frqcount, frqcount$d_17k_5300 > 0.075)

```

```

outl_17k_archi <- subset(frqcount, frqcount$d_17k_archi > 0.075)
outl_5300_760 <- subset(frqcount, frqcount$d_5300_760 > 0.075)
outl_5300_4224 <- subset(frqcount, frqcount$d_5300_4224 > 0.075)
outl_5300_archi <- subset(frqcount, frqcount$d_5300_archi > 0.075)
outl_4224_760 <- subset(frqcount, frqcount$d_4224_760 > 0.075)
outl_4224_archi <- subset(frqcount, frqcount$d_4224_archi > 0.075)
outl_archi_760 <- subset(frqcount, frqcount$d_archi_760 > 0.075)

```

Visualize the outliers.

```

library(ggplot2)
library(ggpubr)

p1 <- ggplot() + geom_point(data=frqcount, aes(x=af_17k, y=af_760), size=0.5) +
  geom_point(data=outl_17k_760, aes(x=af_17k, y=af_760), color="red", size=0.5) +
  theme_light() + xlim(c(0,1)) + ylim(c(0,1))

p2 <- ggplot() + geom_point(data=frqcount, aes(x=af_17k, y=af_4224), size=0.5) +
  geom_point(data=outl_17k_4224, aes(x=af_17k, y=af_4224), color="red", size=0.5) +
  theme_light() + xlim(c(0,1)) + ylim(c(0,1))

p3 <- ggplot() + geom_point(data=frqcount, aes(x=af_17k, y=af_5300), size=0.5) +
  geom_point(data=outl_17k_5300, aes(x=af_17k, y=af_5300), color="red", size=0.5) +
  theme_light() + xlim(c(0,1)) + ylim(c(0,1))

p4 <- ggplot() + geom_point(data=frqcount, aes(x=af_17k, y=af_archi), size=0.5) +
  geom_point(data=outl_17k_archi, aes(x=af_17k, y=af_archi), color="red", size=0.5) +
  theme_light() + xlim(c(0,1)) + ylim(c(0,1))

p5 <- ggplot() + geom_point(data=frqcount, aes(x=af_5300, y=af_760), size=0.5) +
  geom_point(data=outl_5300_760, aes(x=af_5300, y=af_760), color="red", size=0.5) +
  theme_light() + xlim(c(0,1)) + ylim(c(0,1))

p6 <- ggplot() + geom_point(data=frqcount, aes(x=af_5300, y=af_4224), size=0.5) +
  geom_point(data=outl_5300_4224, aes(x=af_5300, y=af_4224), color="red", size=0.5) +
  theme_light() + xlim(c(0,1)) + ylim(c(0,1))

p7 <- ggplot() + geom_point(data=frqcount, aes(x=af_5300, y=af_archi), size=0.5) +
  geom_point(data=outl_5300_archi, aes(x=af_5300, y=af_archi), color="red", size=0.5) +
  theme_light() + xlim(c(0,1)) + ylim(c(0,1))

p8 <- ggplot() + geom_point(data=frqcount, aes(x=af_4224, y=af_760), size=0.5) +
  geom_point(data=outl_4224_760, aes(x=af_4224, y=af_760), color="red", size=0.5) +
  theme_light() + xlim(c(0,1)) + ylim(c(0,1))

p9 <- ggplot() + geom_point(data=frqcount, aes(x=af_4224, y=af_archi), size=0.5) +
  geom_point(data=outl_4224_archi, aes(x=af_4224, y=af_archi), color="red", size=0.5) +
  theme_light() + xlim(c(0,1)) + ylim(c(0,1))

p10 <- ggplot() + geom_point(data=frqcount, aes(x=af_archi, y=af_760), size=0.5) +
  geom_point(data=outl_archi_760, aes(x=af_archi, y=af_760), color="red", size=0.5) +
  theme_light() + xlim(c(0,1)) + ylim(c(0,1))

ggarrange(p1, p2, p3, p4, p5, p6, p7, p8, p9, p10, labels="AUTO")

```

```
ggsave("frqcount_outliers.png", width=15, height=10, scale=1)
```

Create the list of outliers to be excluded.

```
write.table(outl_17k_760, file="frqcount_outliers.txt", row.names=F, quote=F,
sep="\t")

write.table(outl_17k_4224, file="frqcount_outliers.txt", row.names=F, quote=F,
sep="\t", append=T, col.names=F)

write.table(outl_17k_5300, file="frqcount_outliers.txt", row.names=F, quote=F,
sep="\t", append=T, col.names=F)

write.table(outl_17k_archi, file="frqcount_outliers.txt", row.names=F, quote=F,
sep="\t", append=T, col.names=F)

write.table(outl_5300_760, file="frqcount_outliers.txt", row.names=F, quote=F,
sep="\t", append=T, col.names=F)

write.table(outl_5300_4224, file="frqcount_outliers.txt", row.names=F, quote=F,
sep="\t", append=T, col.names=F)

write.table(outl_5300_archi, file="frqcount_outliers.txt", row.names=F, quote=F,
sep="\t", append=T, col.names=F)

write.table(outl_4224_760, file="frqcount_outliers.txt", row.names=F, quote=F,
sep="\t", append=T, col.names=F)

write.table(outl_4224_archi, file="frqcount_outliers.txt", row.names=F, quote=F,
sep="\t", append=T, col.names=F)

write.table(outl_archi_760, file="frqcount_outliers.txt", row.names=F, quote=F,
sep="\t", append=T, col.names=F)
```

Add INDELs (variants with D and I as alleles) and variants on chr24 to be excluded.

```
awk '$5 == "D" || $6 == "D" || $5 == "I" || $6 == "I" || $1 ~ /^24/'
gsa_merged_hg38.bim | cut -f 2 > tmp1

tail -n +2 frqcount_outliers.txt | cut -f 1 >> tmp1

sort tmp1 | uniq > var_to_exclude_from_merged.txt
```

Also remove monomorphic variants.

```
plink -bfile gsa_merged_hg38 --exclude var_to_exclude_from_merged.txt --maf
0.0000001 --make-bed --out gsa_merged_hg38.QC
```

5. Convert the PLINK files to VCF files.

```
plink -bfile gsa_merged_hg38.QC --recode vcf-iid bgz --out
gsa_merged_hg38.QC.no_chr
```

From TOPMed: If your input data is GRCh38/hg38 please ensure chromosomes are encoded with prefix 'chr' (e.g. chr20).

PLINK removes the 'chr' from the chromosome names, add it "manually".

```
zcat gsa_merged_hg38.QC.no_chr.vcf.gz | head -n 29 > gsa_merged_hg38.QC.vcf
```

```
zcat gsa_merged_hg38.QC.no_chr.vcf.gz | tail -n +30 | awk '{ print "chr" $0 }' >>
gsa_merged_hg38.QC.vcf
bgzip gsa_merged_hg38.QC.vcf
bcftools index gsa_merged_hg38.QC.vcf.gz
```

5.a. Split the VCF by chromosome for imputation.

```
for i in $(seq 1 23); do echo $i; bcftools filter -r chr$i
gsa_merged_hg38.QC.vcf.gz -Oz -o gsa_merged_hg38.QC.chr$i.vcf.gz; done
```

5.b. Split in 2 batches of ~15,000 individuals selected randomly (because of the limit of 25,000 individuals maximum on the TOPMed server).

```
zcat gsa_merged_hg38.QC.vcf.gz | grep -m 1 CHROM | cut -f 10- | sed 's/\t/\n/g' >
all_samples.txt2
shuf all_samples.txt2 > all_samples.txt2.shuf
head -n 15000 all_samples.txt2.shuf > all_samples.txt2.shuf.batch1
tail -n +15001 all_samples.txt2.shuf > all_samples.txt2.shuf.batch2
for i in $(seq 23); do bcftools view -S all_samples.txt2.shuf.batch1
gsa_merged_hg38.QC.chr$i.vcf.gz -Oz -o gsa_merged_hg38.QC.chr$i.b1.vcf.gz; bcftools
view -S all_samples.txt2.shuf.batch2 gsa_merged_hg38.QC.chr$i.vcf.gz -Oz -o
gsa_merged_hg38.QC.chr$i.b2.vcf.gz; done
```

6. Imputation on the TOPMed server: <https://imputation.biodatacatalyst.nhlbi.nih.gov>

Settings for the imputation:

1. Reference Panel: TOPMed r2
2. Array Build: GRCh38/hg38
3. Rsq Filter: off
4. Phasing: Eagle v2.4 (phased output)
5. Population: vs. TOPMed Panel
6. Mode: Quality Control & Imputation
7. AES 256 encryption: off
8. Generate Meta-imputation file: on

These chunks were excluded by the imputation server:

8. chunk\_4\_0190000001\_0200000000
9. chunk\_9\_0040000001\_0050000000
10. chunk\_14\_0010000001\_0020000000
11. chunk\_21\_0000000001\_0010000000
12. chunk\_X.PAR2\_0150000001\_0160000000

7. Merge the 2 batches back together.



```
bcftools merge -O v -o chr5.merged.vcf batch1/chr5.dose.vcf.gz
batch2/chr5.dose.vcf.gz
```

7.a. Compute allele frequencies.

```
plink --vcf chr5.merged.vcf --freq --out chr5.merged.freq
```

7.b. Remove monomorphic variants.

```
sed 's/\s\s*/\t/g' chr5.merged.freq.frq | cut -f 2- > chr5.merged.freq.frq.tab
awk '$5 > 0' chr5.merged.freq.frq.tab > chr5.merged.freq.frq.tab.noMono
tail -n +2 chr5.merged.freq.frq.tab.noMono | cut -f 2 | sed 's:/\t/g' | cut -f 1,2
> chr5.merged.freq.frq.tab.noMono.posi
cat chr5.merged.vcf | ruby filter_mono.rb chr5.merged.freq.frq.tab.noMono.posi
chr5.merged.noMono.vcf
```

7.c. Compute a merged Rsq (imputation quality score) for the remaining variants.

```
cat chr5.merged.noMono.vcf | java -jar vcf2gprobs.jar > chr5.merged.noMono.gprobs
cat chr5.merged.noMono.gprobs | java -jar gprobsmetrics.jar >
chr5.merged.noMono.gprobsmetrics
```

The GPROBSMETRICS output contains the following 8 columns:

4. marker identifier
5. minor allele
6. minor allele frequency
7. allelic r-squared
8. dosage r-squared
9. HWE dosage r-squared
10. Accuracy
11. missing score

7.d. Remove obsolete information from VCFs.

```
bcftools annotate -O z -o chr5.merged.clean.noMono.vcf.gz -x
INFO/AF,INFO/MAF,INFO/R2,INFO/ER2 chr5.merged.noMono.vcf
bcftools index chr5.merged.clean.noMono.vcf.gz
```

## 2. EXOME SEQUENCING DATA (n=198)

### 2.1 Exome data summary

The CARTaGENE **exome data** has been generated through 2 PI-lead research projects. Bam files and Fastq files are both available.

| Year | Platform | Nb | PI          | Technical information       | Additional information            |
|------|----------|----|-------------|-----------------------------|-----------------------------------|
| 2012 | illumina | 96 | P. Awadalla | TruSeq Exome Enrichment and | Hodgkinson et al. High-Resolution |

|      |          |     |              |                                                                                                                                                                                                                                                                                                                                         |                                                                                                                                                                                                                                          |
|------|----------|-----|--------------|-----------------------------------------------------------------------------------------------------------------------------------------------------------------------------------------------------------------------------------------------------------------------------------------------------------------------------------------|------------------------------------------------------------------------------------------------------------------------------------------------------------------------------------------------------------------------------------------|
|      |          |     |              | <p>TruSeq DNA LT Sample Prep v2 kits, 100-bp paired-end sequencing on the HiSeq 2000, coverage 40x</p> <p>FASTQ files: raw data</p> <p>Bam files: trimmed reads (Galore), aligned (BWA), PCR duplicates removed (Picard), keep properly paired and uniquely mapped (Picard), realigned and recalibration (GATK)</p>                     | <p>Genomic Analysis of Human Mitochondrial RNA Sequence Variation. Science. 2014; 344: 413-415.</p> <p>Hussin et al. Recombination affects accumulation of damaging and disease-associated mutations in human populations. Nat Genet</p> |
| 2013 | illumina | 102 | L. Excoffier | <p>sequenced these 102 individuals at very high coverage (mean 89.5X, range 67X-128X) for 106.5 Mb of exomic and UTR regions, Roche NimbleGen SeqCap EZ Exome + UTR Library kit, paired-end (2x100bp) sequenced on an Illumina HiSeq 2500 425 System</p> <p>Raw data: fastq</p> <p>Bam files: trimmed reads (Galore), aligned (BWA)</p> | <p>Peischl et al. Relaxed selection during a recent human expansion. Genetics. 2018; 208(2):763-777. 47(4): 400-404.</p>                                                                                                                 |

## 2.2 Creating the VCF files

CARTaGENE offers a VCF of SNPs per set of Exome sequencing.

Each VCF was produced using a set of pipelines and tools developed at McGill University and Génome Québec Innovation Centre (MUGQIC), called Genpipes. The SNP calling was performed on Beluga (Compute Canada) using dnaseq pipeline from Genpipes version 3.1.5 (link to dnaseq version 3.1.5). Input files are BAM files from each set.

Steps 22 to 29 from MUGQIC dnaseq pipeline were performed.

### 3. RNA-SEQ DATA (n=911)

The CARTaGENE **RNA-seq data** has been generated through 1 PI-lead research projects:

| Date | Platform            | Nb  | PI       | Capture Kit                                                                                                                                                                                                                                                                                                                                                            | See these papers for additional information                                                                                    |
|------|---------------------|-----|----------|------------------------------------------------------------------------------------------------------------------------------------------------------------------------------------------------------------------------------------------------------------------------------------------------------------------------------------------------------------------------|--------------------------------------------------------------------------------------------------------------------------------|
| 2012 | illumina sequencing | 911 | Awadalla | <p>TruSeq RNA Sample Prep kit v2, Paired-end RNA sequencing [100 base pairs (bp)], Illumina HiSeq 2000, 3 samples per lane (708), 6 samples per lane (292)</p> <p>Raw data : fastq</p> <p>Bam files: trimmed reads (Galore), aligned (BWA), PCR duplicates removed (Picard), keep properly paired and uniquely mapped (Picard), realigned and recalibration (GATK)</p> | Fave, M. J. et al. Gene-by-environment interactions in urban populations modulate risk phenotypes. Nat. Commun. 9, 827 (2018). |
